# Supplementary figures and images for: Yiqi Fumai lyophilized injection attenuates doxorubicin-induced cardiotoxicity, hepatotoxicity and nephrotoxicity in rats by inhibition of oxidative stress, inflammation and apoptosis
Source: Royal Society of Chemistry journal article supplement (doi:10.1039/c8ra07163b), 2018-01-01

### Supplementary information

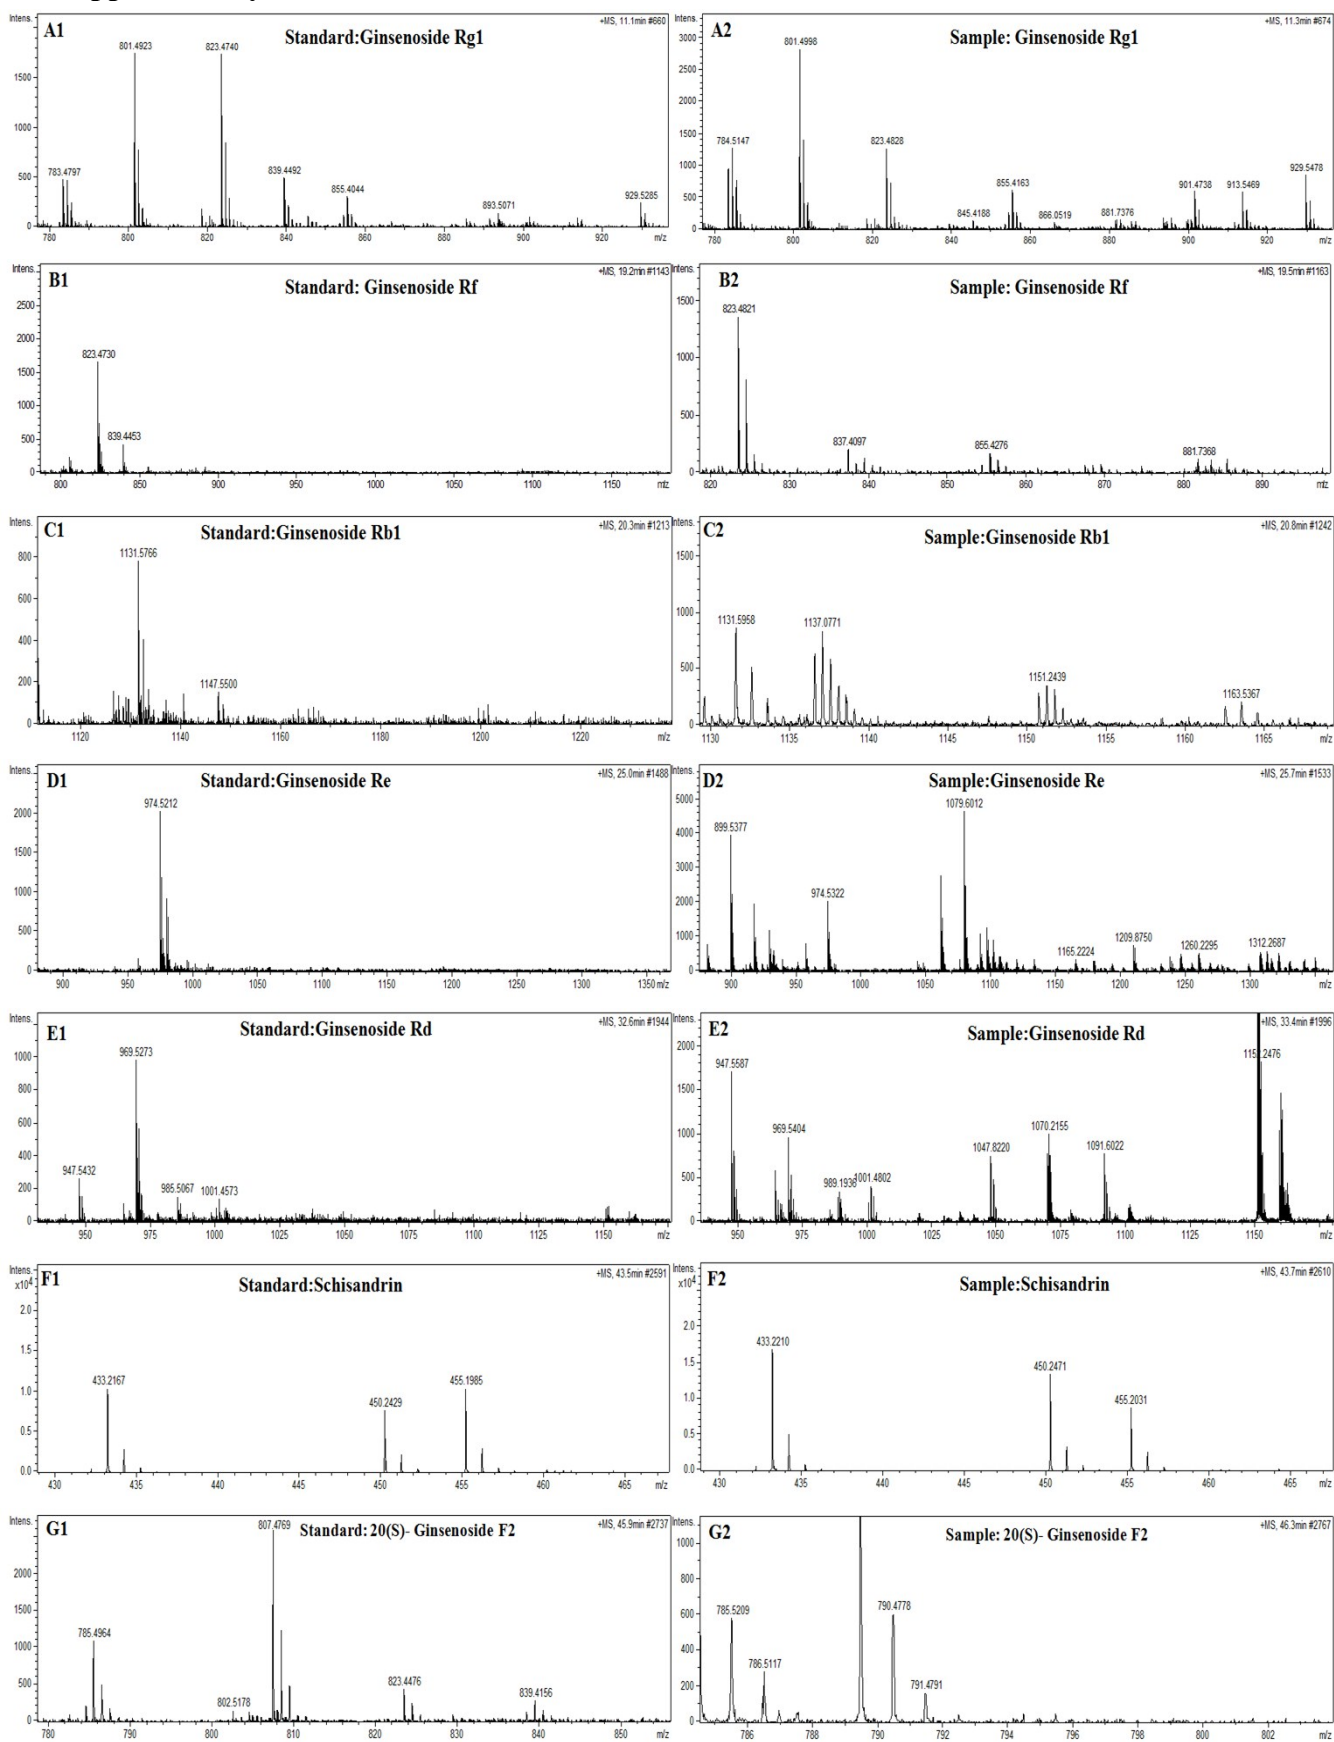

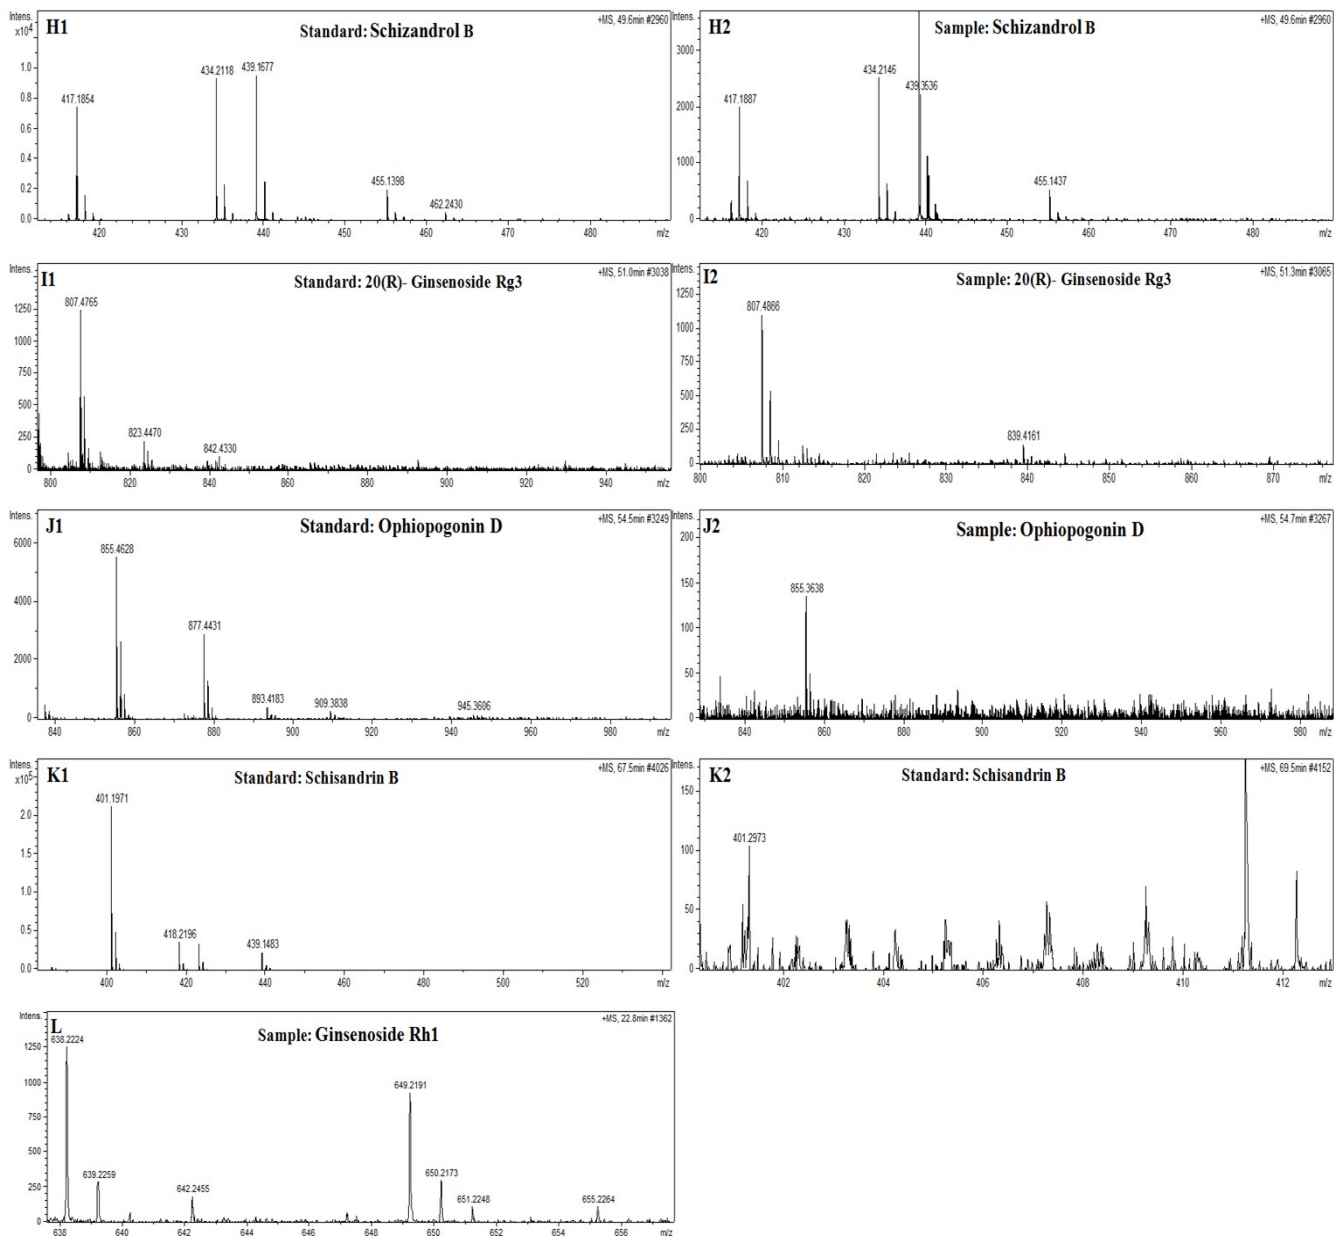

**Fig.** Spectrum for standards (A1) to (K1) and sample (A2) to (L).

Supplement: c8ra07163b1.pdf [file c8ra07163b1.pdf]
